# Supplementary material for: TmAtg6 Plays an Important Role in Anti-Microbial Defense Against Listeria monocytogenes in the Mealworm, Tenebrio molitor
Source: PubMed Central journal article supplement (PMC7072900; doi:10.3390/ijms21041232), 2020-02-12
Supplement: ijms-21-01232-s001.pdf [file ijms-21-01232-s001.pdf]

Supplementary Figure

# TmAtg6 Plays an Important Role in Anti-Microbial Defense Against *Listeria monocytogenes* in the Mealworm, *Tenebrio molitor*

Tariku Tesfaye Edosa <sup>1,†</sup>, Yong Hun Jo <sup>1,†</sup>, Maryam Keshavarz <sup>1</sup>, Ki Beom Park <sup>1</sup>, Jun Ho Cho <sup>1</sup>, Young Min Bae <sup>1</sup>, Bobae Kim <sup>1</sup>, Yong Seok Lee <sup>2</sup> and Yeon Soo Han <sup>1,\*</sup>

<sup>1</sup> Department of Applied Biology, Institute of Environmentally-Friendly Agriculture (IEFA), College of Agriculture and Life Sciences, Chonnam National University, Gwangju 61186, Korea

<sup>2</sup> Department of Life Science and Biotechnology, College of Natural Sciences, Soonchunhyang University, Asan city 31538, Korea

\* Correspondence: hanyes@jnu.ac.kr; Tel.: +82-62-530-2072

† These authors contributed equally to this work.

|             | TmAtg6 | TcBeclin-1 | AvBeclin-1 | AgBeclin-1 | DvBeclin-1 | CfBeclin-1 | GmAtg6 | BmBeclin-1 | DpAtg6 | CqBeclin-1 | AgBeclin-1 | AfBeclin-1 | AmAtg6 | DqBeclin-1 | DaBeclin-1 | PpBeclin-1 | PxBeclin-1 | AaBeclin-1 | AtBeclin-1 | AdBeclin-1 | DmAtg6 | AgoBeclin-1 | ApBeclin-1 | DnBeclin-1 | HhBeclin-1 | CeBeclin |
|-------------|--------|------------|------------|------------|------------|------------|--------|------------|--------|------------|------------|------------|--------|------------|------------|------------|------------|------------|------------|------------|--------|-------------|------------|------------|------------|----------|
| TmAtg6      | 89     | 85         | 71         | 68         | 60         | 59         | 59     | 59         | 59     | 59         | 59         | 59         | 59     | 59         | 59         | 58         | 58         | 58         | 57         | 56         | 56     | 54          | 54         | 53         | 41         | 29       |
| TcBeclin-1  | 84     | 91         | 76         | 74         | 64         | 63         | 63     | 63         | 64     | 63         | 64         | 64         | 64     | 64         | 64         | 62         | 63         | 62         | 60         | 60         | 60     | 59          | 59         | 59         | 44         | 29       |
| AvBeclin-1  | 82     | 92         | 75         | 72         | 62         | 62         | 62     | 62         | 64     | 63         | 63         | 63         | 63     | 62         | 61         | 60         | 63         | 60         | 59         | 60         | 59     | 59          | 58         | 44         | 28         |          |
| AgBeclin-1  | 70     | 79         | 79         | 79         | 66         | 65         | 64     | 64         | 69     | 68         | 64         | 64         | 64     | 66         | 63         | 64         | 68         | 62         | 64         | 61         | 62     | 62          | 62         | 43         | 32         |          |
| DvBeclin-1  | 67     | 76         | 77         | 84         | 66         | 62         | 62     | 64         | 66     | 63         | 64         | 64         | 65     | 65         | 63         | 62         | 66         | 62         | 60         | 59         | 59     | 59          | 58         | 41         | 33         |          |
| CfBeclin-1  | 55     | 61         | 61         | 63         | 64         | 67         | 68     | 66         | 70     | 70         | 91         | 91         | 92     | 88         | 69         | 67         | 71         | 68         | 66         | 63         | 63     | 63          | 62         | 47         | 32         |          |
| GmAtg6      | 55     | 61         | 60         | 63         | 62         | 65         | 93     | 89         | 68     | 70         | 66         | 66         | 66     | 68         | 92         | 92         | 68         | 93         | 66         | 59         | 60     | 60          | 60         | 43         | 31         |          |
| BmBeclin-1  | 55     | 61         | 61         | 63         | 62         | 66         | 93     | 89         | 70     | 70         | 68         | 68         | 67     | 69         | 93         | 90         | 70         | 93         | 66         | 60         | 60     | 60          | 59         | 45         | 32         |          |
| DpAtg6      | 55     | 61         | 61         | 63         | 65         | 92         | 91     | 70         | 69     | 66         | 66         | 66         | 67     | 92         | 91         | 71         | 89         | 66         | 60         | 60         | 60     | 59          | 44         | 30         |            |          |
| CqBeclin-1  | 55     | 61         | 62         | 66         | 64         | 69         | 65     | 67         | 66     | 86         | 71         | 71         | 70     | 72         | 69         | 68         | 93         | 68         | 80         | 66         | 64     | 64          | 64         | 46         | 34         |          |
| AgBeclin-1  | 56     | 60         | 60         | 63         | 60         | 66         | 64     | 65         | 64     | 83         | 70         | 70         | 68     | 70         | 70         | 69         | 84         | 69         | 89         | 64         | 63     | 63          | 63         | 45         | 33         |          |
| AfBeclin-1  | 54     | 60         | 61         | 63         | 63         | 91         | 64     | 65         | 64     | 69         | 65         | 99         | 92     | 91         | 68         | 66         | 71         | 67         | 66         | 64         | 63     | 63          | 62         | 46         | 33         |          |
| AmAtg6      | 54     | 60         | 61         | 63         | 63         | 92         | 64     | 65         | 64     | 69         | 65         | 100        | 93     | 90         | 68         | 66         | 71         | 67         | 66         | 64         | 63     | 63          | 63         | 47         | 33         |          |
| DqBeclin-1  | 54     | 61         | 61         | 63         | 64         | 94         | 65     | 65         | 65     | 69         | 65         | 92         | 92     | 87         | 68         | 65         | 71         | 67         | 67         | 63         | 63     | 62          | 46         | 33         |            |          |
| DaBeclin-1  | 54     | 60         | 60         | 63         | 62         | 89         | 66     | 66         | 65     | 70         | 66         | 91         | 91     | 88         | 69         | 67         | 72         | 68         | 67         | 64         | 63     | 63          | 63         | 46         | 32         |          |
| PpBeclin-1  | 54     | 61         | 61         | 62         | 63         | 66         | 94     | 93         | 93     | 66         | 65         | 65         | 65     | 66         | 67         | 91         | 70         | 93         | 67         | 60         | 60     | 60          | 59         | 44         | 31         |          |
| PxBeclin-1  | 54     | 60         | 60         | 62         | 61         | 65         | 92     | 90         | 91     | 65         | 64         | 64         | 64     | 65         | 91         | 68         | 91         | 65         | 60         | 60         | 60     | 60          | 60         | 44         | 31         |          |
| AaBeclin-1  | 54     | 60         | 61         | 64         | 63         | 68         | 64     | 65         | 66     | 93         | 81         | 68         | 68     | 68         | 69         | 66         | 65         | 68         | 79         | 65         | 64     | 64          | 64         | 45         | 33         |          |
| AtBeclin-1  | 54     | 60         | 60         | 62         | 61         | 66         | 92     | 91         | 89     | 66         | 65         | 64         | 64     | 65         | 66         | 92         | 90         | 65         | 66         | 59         | 59     | 59          | 59         | 43         | 31         |          |
| AdBeclin-1  | 53     | 57         | 57         | 60         | 58         | 63         | 61     | 62         | 61     | 80         | 88         | 62         | 62     | 63         | 63         | 62         | 61         | 79         | 62         | 60         | 61     | 61          | 61         | 43         | 32         |          |
| DmAtg6      | 53     | 59         | 60         | 61         | 61         | 62         | 57     | 57         | 58     | 64         | 62         | 62         | 62     | 62         | 62         | 57         | 58         | 63         | 57         | 60         | 58     | 58          | 58         | 43         | 32         |          |
| AgoBeclin-1 | 51     | 58         | 58         | 61         | 59         | 61         | 57     | 57         | 57     | 61         | 58         | 61         | 61     | 61         | 60         | 57         | 58         | 61         | 57         | 57         | 57     | 57          | 98         | 46         | 32         |          |
| ApBeclin-1  | 51     | 58         | 58         | 62         | 59         | 61         | 57     | 57         | 57     | 61         | 59         | 61         | 61     | 60         | 57         | 58         | 61         | 57         | 58         | 57         | 98     | 98          | 45         | 32         |            |          |
| DnBeclin-1  | 51     | 58         | 58         | 61         | 59         | 61         | 57     | 56         | 57     | 61         | 58         | 61         | 61     | 60         | 57         | 58         | 61         | 57         | 57         | 56         | 97     | 97          | 45         | 32         |            |          |
| HhBeclin-1  | 38     | 40         | 40         | 40         | 39         | 44         | 40     | 41         | 40     | 43         | 42         | 44         | 44     | 43         | 44         | 40         | 40         | 40         | 41         | 42         | 42     | 42          | 42         | 26         |            |          |
| CeBeclin    | 26     | 28         | 28         | 30         | 30         | 29         | 30     | 30         | 29     | 28         | 30         | 30         | 30     | 30         | 29         | 30         | 29         | 28         | 30         | 27         | 29     | 30          | 30         | 30         | 25         |          |

**Figure S1.** Percent identity of TmAtg6 with its orthologs. The percent identity was determined using specific domain and full length ORF. Maximum identities are circled with green and red in specific domain and full length, respectively.
